# Supplementary material for: Emergence of multiple variants of SARS-CoV-2 with signature structural changes
Source: bioRxiv or medRxiv preprint supplement (doi:10.1101/2020.04.26.062471), 2020-04-29

Supplementary Figure 1: Average nucleotide diversity ( $\pi$ ), rate of synonymous ( $dS$ ) and non-synonymous ( $dN$ ) substitution rates for four phylogenetic groups (B, C, D & E)

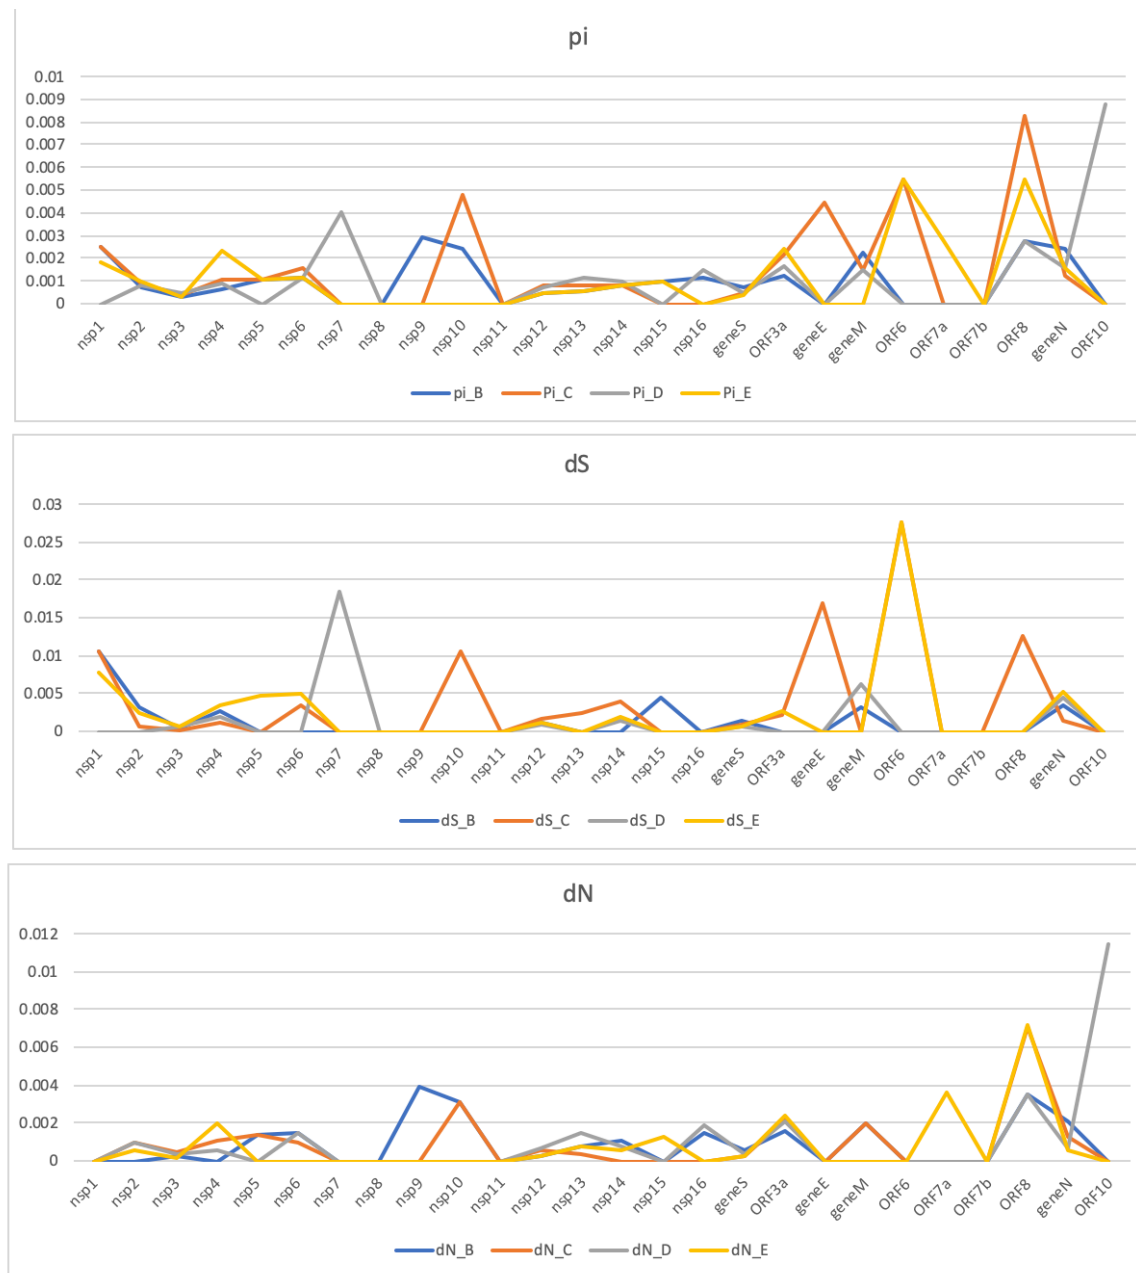

Supplement: Supplementary file [file media-1.pdf]
